# Supplementary material for: Degranulation enhances presynaptic membrane packing, which protects NK cells from perforin-mediated autolysis
Source: PubMed Central journal article supplement (PMC8330931; doi:10.1371/journal.pbio.3001328), 2021-08-03

# Raw pictures for Figure 5A

Three raw gel images used in Figure 5A are attached below:

Proteins in each samples: perforin only

Capture method: Odyssey CLx scanner

Molecular weight markers and loading order have been annotated without obscuring any data or background bands.

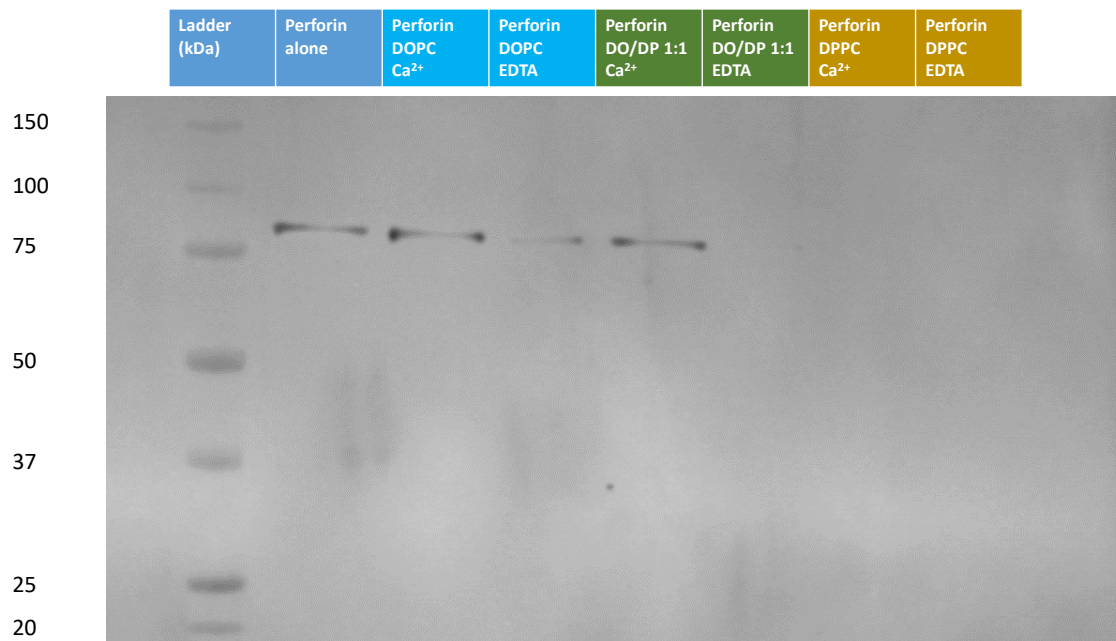

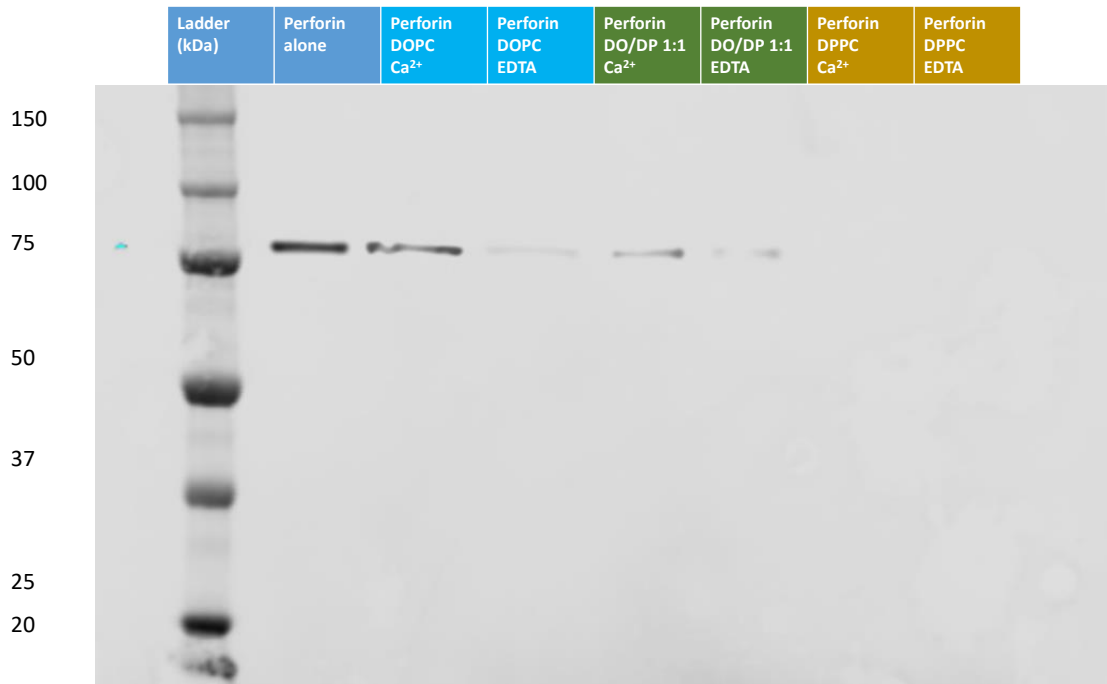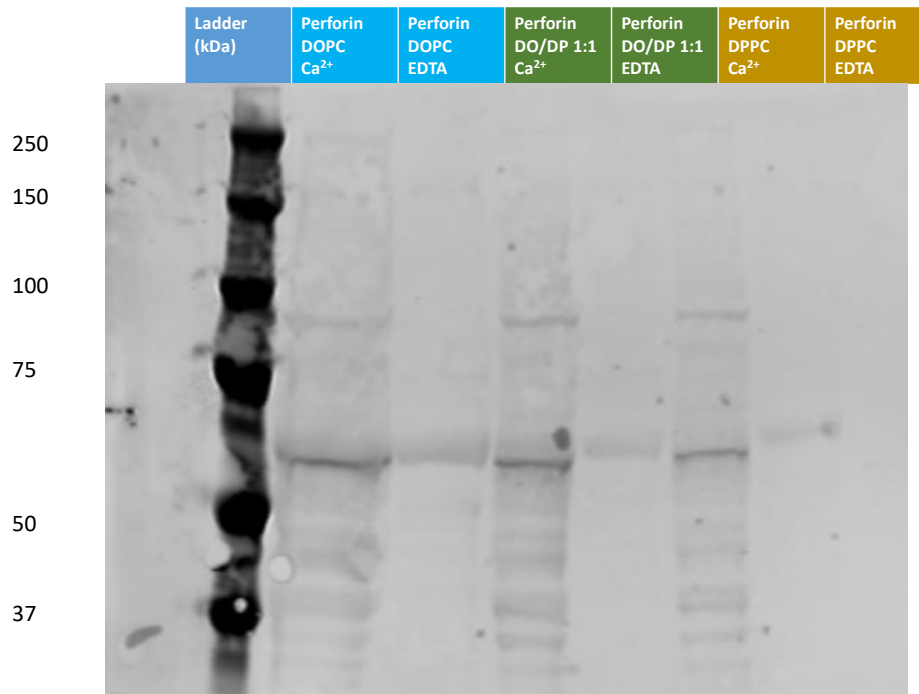

# Raw pictures for Figure 5C

Three raw gel images used in Figure 5C are attached below:

Proteins in each samples: perforin only

Capture method: Odyssey CLx scanner

Molecular weight markers and loading order have been annotated without obscuring any data or background bands.

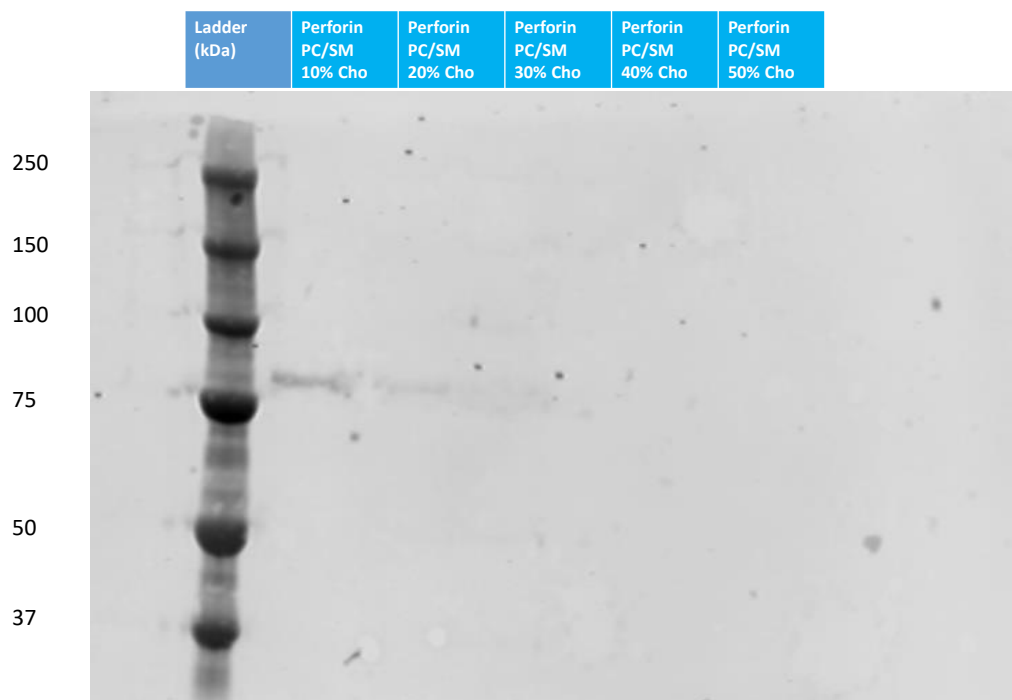

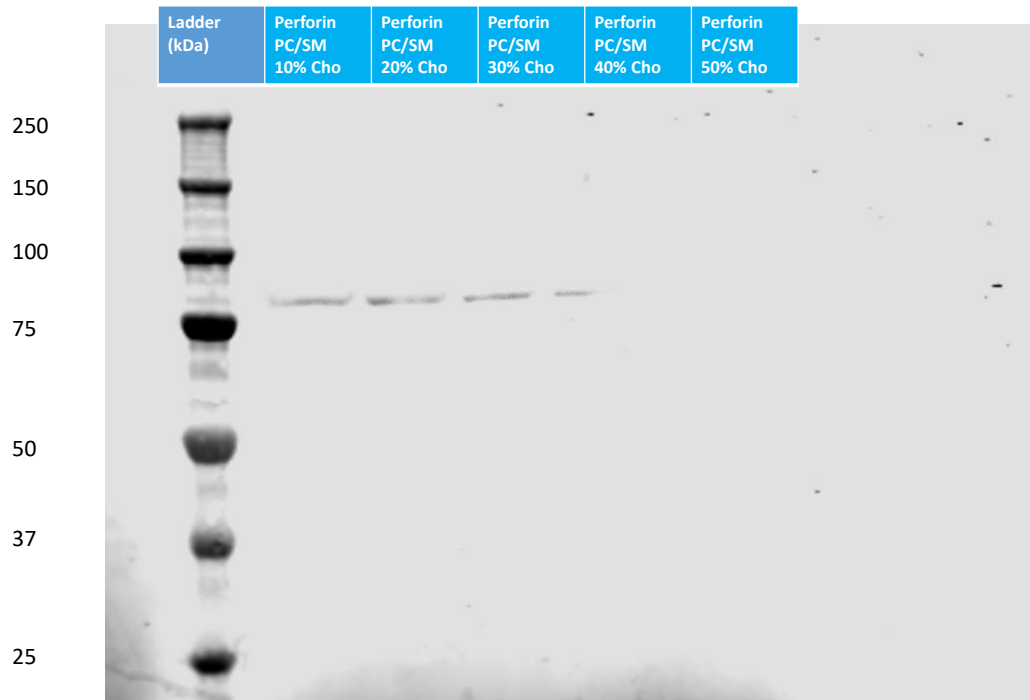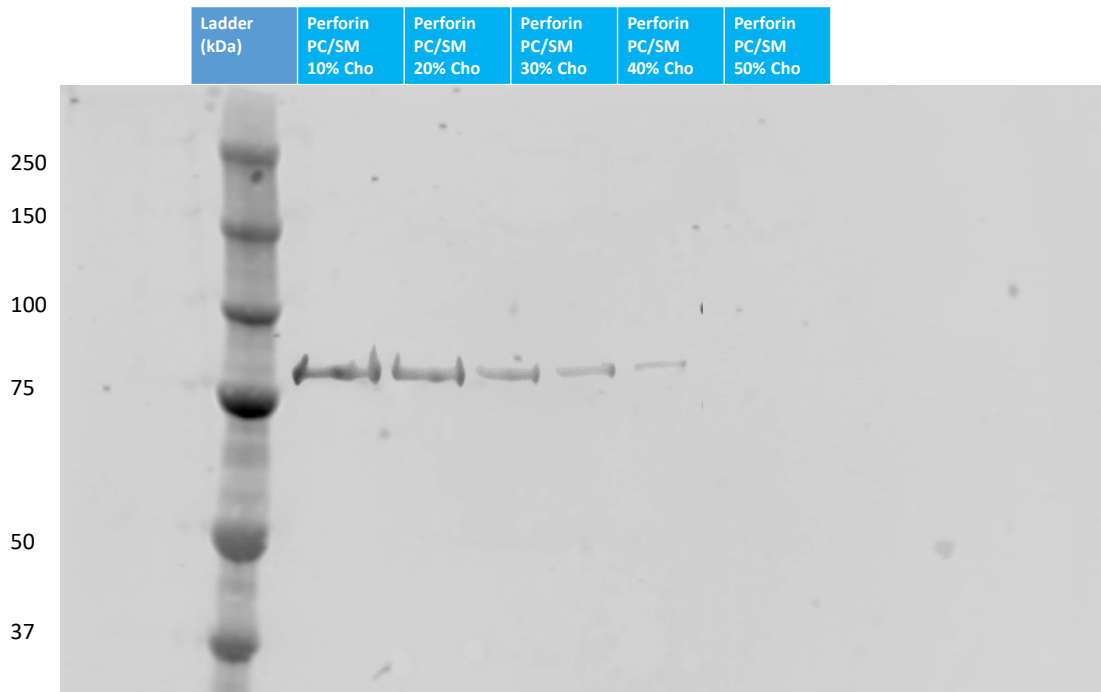

# Raw pictures for Figure S9

Raw and annotated gel images used in Figure S9 are attached below:

Samples: cell lysates

Capture method: Odyssey CLx scanner

Molecular weight markers and loading order have been annotated without obscuring any data or background bands.

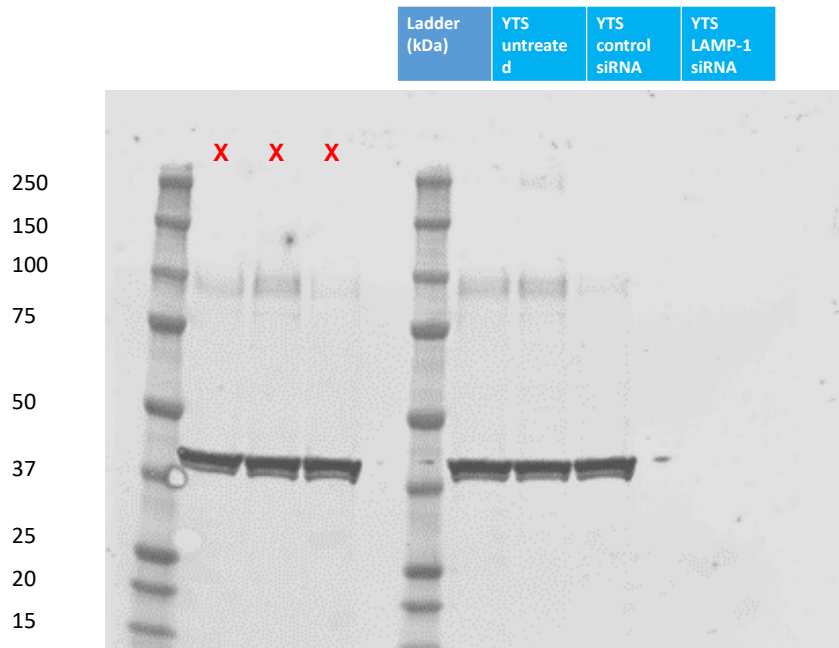

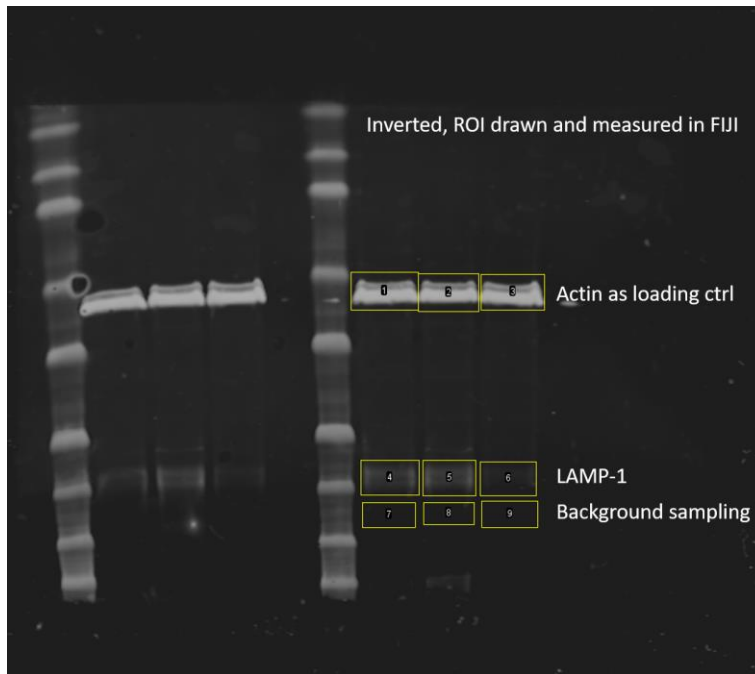

Supplement: pbio.3001328.s011.pdf [file pbio.3001328.s011.pdf]
